# Supplementary material
Source: MDPI journal article supplement (https://www.mdpi.com/2071-1050/15/9/7219)
Supplement: s1 [file s1 › sustainability-2257121-supplementary.pdf]

## **Figure S1 – Interview guide**

Interviewees all completed a consent form and are protected by European General Data Protection Regulation. Interviews had only open questions and were semi-directed. Here is the general guide which was used to conduct interviews.

### **0. Elements of identification of the respondent**

- 0.1. Explain your role within the practice/in the local context (in the field work context).
- 0.2. Can you briefly explain your personal experience before being involved in the practice/ before starting the practice?

### **1. Origins of the Versailles plain association**

- 1.1. What are the origins of the idea?
- 1.2. Who were the promoters ?
- 1.3. What were their motivations/targets?
- 1.4 Can you describe the local context?
- 1.5 What are the main obstacles?
- 1.6 The main strengths?
- 1.7 What are the feelings shared by the promoters?

### **2. Description of interviewees' practices**

#### **FOR NEW ENTRANTS INTO FARMING:**

- 2.1. Description of the pathways of farm establishment
- 2.2. Description of the farm
- 2.3 Environmental aspects
- 2.4 Working in the farm
- 2.5 Innovation implemented
- 2.6 Marketing products
- 2.7 Economic aspects
- 2.8. Relationships with the local context and outside the local context
- 2.9. Advantages and constraints from the local context
- 2.10. Advantages and disadvantages of policies

#### **FOR SUCCESSORS:**

- 2.1. Description of the pathways of farm establishment
- 2.2. Description of the farm
- 2.3 Environmental aspects
- 2.4 Main change in the farm when the succession have been done
- 2.5 Working in the farm
- 2.6 Innovation implemented
- 2.7 Marketing products
- 2.8 Economic aspects
- 2.9. Relationships with the local context and outside the local context
- 2.10. Advantages and constraints from the local context
- 2.11. Advantages and disadvantages of policies

#### **FOR NEWCOMERS:**

- 2.1. Description of the pathways of establishment
- 2.2. Description of the activities implemented
- 2.3 Environmental aspects
- 2.4. Working in rural areas
- 2.5 Innovation implemented
- 2.6 Marketing products
- 2.7 Economic aspects
- 2.8. Relationships with the local context and outside the local context
- 2.9. Advantages and constraints from the local context
- 2.10. Advantages and disadvantages of policies

#### FOR OTHER RESPONDENTS

- 2.3 Environmental aspects
- 2.4. Working in rural areas
- 2.5 Innovation implemented
- 2.7 Economic aspects
- 2.8. Relationships with the local context and outside the local context
- 2.9. Advantages and constraints from the local context
- 2.10. Advantages and disadvantages of policies

#### **3. Impact of the practice and perspectives**

- 3.1. What has been the impact of their practices and the VPA?
- 3.2. Perspectives for the future?
- 3.3 How do you understand rural regeneration?
